# Supplementary material for: Mid-infrared fibre evanescent wave spectroscopy of serum allows fingerprinting of the hepatic metabolic status in mice
Source: Royal Society of Chemistry journal article supplement (doi:10.1039/c6an00136j), 2016-01-01
Supplement: c6an00136j1.pdf [file c6an00136j1.pdf]

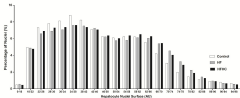

Figure 15: Hepatocyte nuclei DNA content. Percentage of hepatocytes nuclei per surface unit.  
The analysis was performed on histogen stainings.
