# Supplementary material for: Mid-infrared fibre evanescent wave spectroscopy of serum allows fingerprinting of the hepatic metabolic status in mice
Source: Royal Society of Chemistry journal article supplement (doi:10.1039/c6an00136j), 2016-01-01
Supplement: c6an00136j2.pdf [file c6an00136j2.pdf]

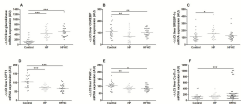

Figure 28. Analysis of hepatic gene expression by quantitative RT-PCR. A : Cyp1b1; B: Cyp2b10; C: Bcl2l1; D: Cyp1b1; E: Cyp2b10; F: Bcl2l1. \* $p < 0.05$ ; \*\* $p < 0.01$ ; \*\*\* $p < 0.001$ .
