# Supplementary material for: Mid-infrared fibre evanescent wave spectroscopy of serum allows fingerprinting of the hepatic metabolic status in mice
Source: Royal Society of Chemistry journal article supplement (doi:10.1039/c6an00136j), 2016-01-01
Supplement: c6an00136j4.pdf [file c6an00136j4.pdf]

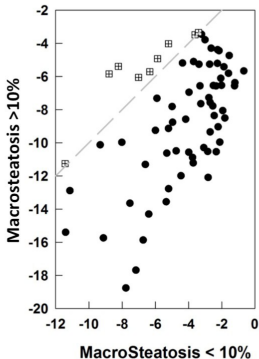

**Figure 4S. Identification of two macrosteatosis classes by a LDA algorithm.** The graph is splittedd in two areas delimited by a dashed grey line: the sample above 10% show up in the left upper corner and that below 10% in the right down corner.
